# Supplementary material
Source: publisher figshare collection journal article supplement (https://acs.figshare.com/ndownloader/files/4157122)
Supplement: Supplementary file 1 [file 4157122]

# Improvement of water-, sulfur dioxide- and dust-resistance in selective catalytic reduction of $\text{NO}_x$ with $\text{NH}_3$ using wire-mesh honeycomb catalyst

Yun Shu, Hong Sun, Xie Quan\*, Shuo Chen

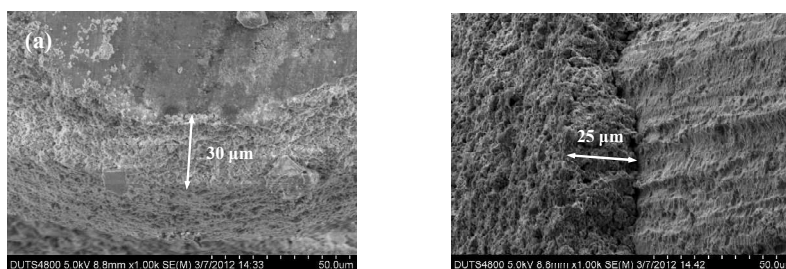

Fig S1. SEM of alumina coating on different substrates. (a) wire-mesh; (b) ceramic.

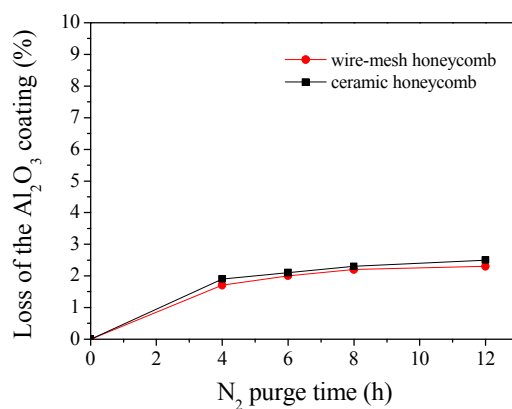

Fig S2. Mass loss of alumina coating over wire-mesh honeycomb and ceramic honeycomb with the time of SCR reaction, GHSV= 10,000  $\text{h}^{-1}$ .
